# Supplementary material for: The potential of invasive and non-invasive vagus nerve stimulation to improve verbal memory performance in epilepsy patients
Source: PubMed Central journal article supplement (PMC8821667; doi:10.1038/s41598-022-05842-3), 2022-02-07
Supplement: 41598_2022_5842_MOESM1_ESM.pdf [file 41598_2022_5842_MOESM1_ESM.pdf]

# The potential of invasive and non-invasive vagus nerve stimulation to improve verbal memory performance in epilepsy patients

Ann Mertens<sup>1\*</sup>, Stefanie Gadeyne<sup>1</sup>, Emma Lescrauwaet<sup>1</sup>, Evelien Carrette<sup>1</sup>, Alfred Meurs<sup>1</sup>, Veerle De Herdt<sup>1</sup>, Frank Dewaele<sup>2</sup>, Robrecht Raedt<sup>1</sup>, Marijke Miatton<sup>1</sup>, Paul Boon<sup>1,3</sup>, Kristl Vonck<sup>1</sup>

<sup>1</sup>Department of Neurology, 4BRAIN research group, Ghent University Hospital, Ghent, Belgium

<sup>2</sup>Department of Neurosurgery, Ghent University Hospital, Ghent, Belgium

<sup>3</sup>Department of Electrical Engineering, Eindhoven University of Technology, Eindhoven, The Netherlands

**Supplementary table 1: overview of individual scores****Session 1:**

| <b>Patient</b> | <b>Order</b> | <b>Intervention</b> | <b>Immediate recall score (%)</b> | <b>Hit score (%)</b> | <b>Discrimination index (%)</b> | <b>Attention score (%)</b> |
|----------------|--------------|---------------------|-----------------------------------|----------------------|---------------------------------|----------------------------|
| <b>1</b>       | Block 1      | VNS ON              | 28,57                             | 71,43                | 23,81                           | 100,00                     |
|                | Block 2      | VNS OFF             | 9,52                              | 66,67                | 52,38                           | 50,00                      |
|                | Block 3      | taVNS               | 33,33                             | 76,19                | 52,38                           | 50,00                      |
| <b>2</b>       | Block 1      | VNS ON              | 52,38                             | 33,33                | 28,57                           | 83,33                      |
|                | Block 2      | taVNS               | 23,81                             | 23,81                | 23,81                           | 100,00                     |
|                | Block 3      | VNS OFF             | 66,67                             | 61,90                | 57,14                           | 83,33                      |
| <b>3</b>       | Block 1      | VNS ON              | 42,86                             | 57,14                | 57,14                           | 83,33                      |
|                | Block 2      | taVNS               | 42,86                             | 47,62                | 42,86                           | 83,33                      |
|                | Block 3      | VNS OFF             | 38,10                             | 52,38                | 52,38                           | 66,67                      |
| <b>4</b>       | Block 1      | VNS ON              | 76,19                             | 38,10                | 38,10                           | 75,00                      |
|                | Block 2      | taVNS               | 85,71                             | 42,86                | 28,57                           | 100,00                     |
|                | Block 3      | VNS OFF             | 95,24                             | 85,71                | 85,71                           | 91,67                      |
| <b>5</b>       | Block 1      | VNS OFF             | 23,81                             | 14,29                | 14,29                           | 66,67                      |
|                | Block 2      | VNS ON              | 14,29                             | 9,52                 | 4,76                            | 66,67                      |
|                | Block 3      | taVNS               | 4,76                              | 9,52                 | 9,52                            | 100,00                     |
| <b>6</b>       | Block 1      | VNS ON              | 85,71                             | 85,71                | 71,43                           | 91,67                      |
|                | Block 2      | VNS OFF             | 61,90                             | 76,19                | 66,67                           | 83,33                      |
|                | Block 3      | taVNS               | 61,90                             | 76,19                | 76,19                           | 83,33                      |
| <b>7</b>       | Block 1      | VNS OFF             | 23,81                             | 80,95                | 19,05                           | 66,67                      |
|                | Block 2      | taVNS               | 9,52                              | 71,43                | 23,81                           | 50,00                      |
|                | Block 3      | VNS ON              | 28,57                             | 85,71                | 14,29                           | 33,33                      |
| <b>8</b>       | Block 1      | taVNS               | 61,90                             | 33,33                | 14,29                           | 50,00                      |
|                | Block 2      | VNS ON              | 57,14                             | 57,14                | 23,81                           | 66,67                      |
|                | Block 3      | VNS OFF             | 42,86                             | 80,95                | 61,90                           | 66,67                      |
| <b>9</b>       | Block 1      | taVNS               | 38,10                             | 14,29                | 14,29                           | 100,00                     |
|                | Block 2      | VNS OFF             | 57,14                             | 28,57                | 23,81                           | 100,00                     |
|                | Block 3      | VNS ON              | 52,38                             | 47,62                | 42,86                           | 100,00                     |
| <b>10</b>      | Block 1      | VNS OFF             | 38,10                             | 57,14                | 42,86                           | 83,33                      |
|                | Block 2      | taVNS               | 61,90                             | 90,48                | 61,90                           | 83,33                      |
|                | Block 3      | VNS ON              | 69,05                             | 85,71                | 52,38                           | 100,00                     |
| <b>11</b>      | Block 1      | VNS OFF             | 19,05                             | 76,19                | 52,38                           | 58,33                      |
|                | Block 2      | VNS ON              | 19,05                             | 76,19                | 57,14                           | 83,33                      |
|                | Block 3      | taVNS               | 23,81                             | 85,71                | 42,86                           | 58,33                      |
| <b>12</b>      | Block 1      | taVNS               | 23,81                             | 42,86                | 23,81                           | 75,00                      |
|                | Block 2      | VNS OFF             | 23,81                             | 47,62                | 28,57                           | 41,67                      |
|                | Block 3      | VNS ON              | 19,05                             | 66,67                | 47,62                           | 41,67                      |
| <b>13</b>      | Block 1      | VNS OFF             | 14,29                             | 38,10                | ,00                             | 58,33                      |
|                | Block 2      | VNS ON              | 9,52                              | 57,14                | 33,33                           | 16,67                      |
|                | Block 3      | taVNS               | 9,52                              | 47,62                | 4,76                            | 58,33                      |
| <b>14</b>      | Block 1      | VNS ON              | 14,29                             | 71,43                | 57,14                           | 83,33                      |
|                | Block 2      | taVNS               | 28,57                             | 47,62                | 33,33                           | 58,33                      |
|                | Block 3      | VNS OFF             | 52,38                             | 71,43                | 66,67                           | 66,67                      |
| <b>15</b>      | Block 1      | taVNS               | 42,86                             | 23,81                | 23,81                           | 75,00                      |
|                | Block 2      | VNS ON              | 33,33                             | 14,29                | 4,76                            | 100,00                     |
|                | Block 3      | VNS OFF             | 38,10                             | 23,81                | 19,05                           | 66,67                      |

**Session 2:**

| <b>Patient</b> | <b>Order</b> | <b>Intervention</b> | <b>Immediate recall score (%)</b> | <b>Hit score (%)</b> | <b>Discrimination index (%)</b> | <b>Attention score (%)</b> |
|----------------|--------------|---------------------|-----------------------------------|----------------------|---------------------------------|----------------------------|
| <b>1</b>       | Block 1      | VNS OFF             | 28,57                             | 76,19                | 9,52                            | 66,67                      |
|                | Block 2      | VNS ON              | 33,33                             | 76,19                | 23,81                           | 50,00                      |
| <b>2</b>       | Block 1      | VNS ON              | 42,86                             | 57,14                | 57,14                           | 83,33                      |
|                | Block 2      | VNS OFF             | 85,71                             | 76,19                | 76,19                           | 83,33                      |
| <b>3</b>       | Block 1      | VNS ON              | /                                 | /                    | /                               | /                          |
|                | Block 2      | VNS OFF             | /                                 | /                    | /                               | /                          |
| <b>4</b>       | Block 1      | VNS OFF             | 100,00                            | 95,24                | 95,24                           | 100,00                     |
|                | Block 2      | VNS ON              | 80,95                             | 80,95                | 80,95                           | 100,00                     |
| <b>5</b>       | Block 1      | VNS OFF             | 28,57                             | 38,10                | 38,10                           | 75,00                      |
|                | Block 2      | VNS ON              | 19,05                             | 14,29                | 4,76                            | 50,00                      |
| <b>6</b>       | Block 1      | VNS ON              | 69,05                             | 66,67                | 57,14                           | 83,33                      |
|                | Block 2      | VNS OFF             | 66,67                             | 57,14                | 47,62                           | 100,00                     |
| <b>7</b>       | Block 1      | VNS ON              | 47,62                             | 85,71                | 52,38                           | 66,67                      |
|                | Block 2      | VNS OFF             | 38,10                             | 80,95                | 52,38                           | 91,67                      |
| <b>8</b>       | Block 1      | VNS ON              | 66,67                             | 47,62                | 33,33                           | 41,67                      |
|                | Block 2      | VNS OFF             | 42,86                             | 61,90                | 42,86                           | 58,33                      |
| <b>9</b>       | Block 1      | VNS ON              | 71,43                             | 61,90                | 57,14                           | 100,00                     |
|                | Block 2      | VNS OFF             | 52,38                             | 80,95                | 66,67                           | 100,00                     |
| <b>10</b>      | Block 1      | VNS ON              | 71,43                             | 66,67                | 66,67                           | 58,33                      |
|                | Block 2      | VNS OFF             | 61,90                             | 80,95                | 61,90                           | 83,33                      |
| <b>11</b>      | Block 1      | VNS OFF             | 38,10                             | 80,95                | 57,14                           | 66,67                      |
|                | Block 2      | VNS ON              | 61,90                             | 95,24                | 76,19                           | 50,00                      |
| <b>12</b>      | Block 1      | VNS OFF             | 57,14                             | 42,86                | 33,33                           | 8,33                       |
|                | Block 2      | VNS ON              | 30,95                             | 47,62                | 47,62                           | 66,67                      |
| <b>13</b>      | Block 1      | VNS OFF             | 9,52                              | 38,10                | 9,52                            | 8,33                       |
|                | Block 2      | VNS ON              | 33,33                             | 33,33                | 23,81                           | 33,33                      |
| <b>14</b>      | Block 1      | VNS OFF             | 52,38                             | 80,95                | 38,10                           | 50,00                      |
|                | Block 2      | VNS ON              | 47,62                             | 90,48                | 42,86                           | 66,67                      |
| <b>15</b>      | Block 1      | VNS OFF             | 47,62                             | 38,10                | 38,10                           | 83,33                      |
|                | Block 2      | VNS ON              | 28,57                             | 38,10                | 33,33                           | 83,33                      |
